# Supplementary material for: Dehydrogenation of the liquid organic hydrogen carrier perhydrodibenzyltoluene – reaction pathway over Pt/Al2O3
Source: Royal Society of Chemistry journal article supplement (doi:10.1039/d2re00345g), 2022-09-30
Supplement: d2re00345g1.pdf [file d2re00345g1.pdf]

## Supporting information

### Dehydrogenation of the liquid organic hydrogen carrier perhydrodibenzyltoluene – reaction pathway over Pt/Al<sub>2</sub>O<sub>3</sub>

Libin Shi <sup>1,2,3</sup>, Suitao Qi <sup>\*1</sup>, Kevin J. Smith <sup>\*2</sup>, Majed Alamoudi <sup>2,4</sup>, Yiming Zhou <sup>1</sup>

*1 Shaanxi Key Laboratory of Energy Chemical Process Intensification, School of Chemical Engineering and Technology, Xi'an Jiaotong University, Xi'an, Shaanxi, 710049, P.R. China*

*2 Department of Chemical & Biological Engineering, University of British Columbia, 2360 East Mall, Vancouver, BC, V6T 1Z3, Canada*

*3 SINOPEC Research Institute of Petroleum Processing, Beijing 100083, P.R. China*

*4 Department of Chemical and Materials Engineering, Faculty of Engineering, King Abdulaziz University, Jeddah 21589, Saudi Arabia*

\*E-mail: [suitaoqi@mail.xjtu.edu.cn](mailto:suitaoqi@mail.xjtu.edu.cn) (Suitao Qi); [kjs@mail.ubc.ca](mailto:kjs@mail.ubc.ca) (Kevin J. Smith)

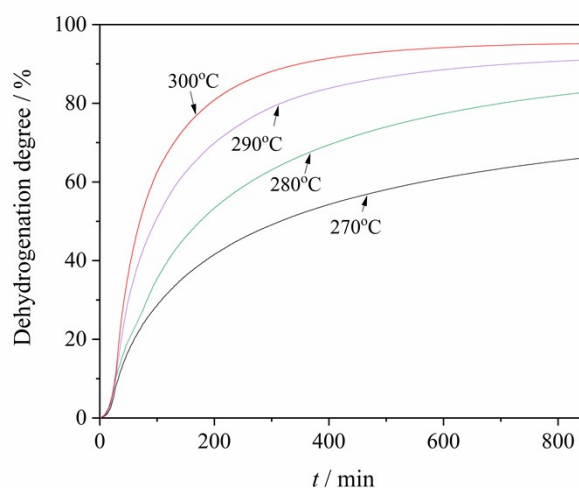

Fig. S1 Dehydrogenation of H18-DBT at different temperature

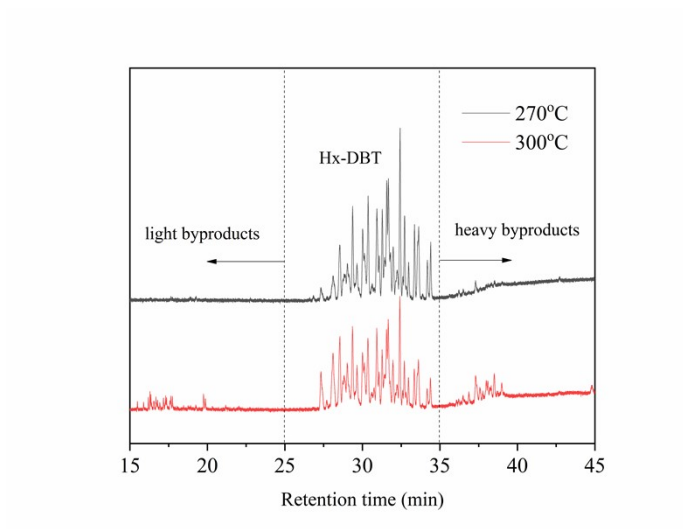

Fig. S2 GC-MS results of dehydrogenation products at 270 °C and 300 °C

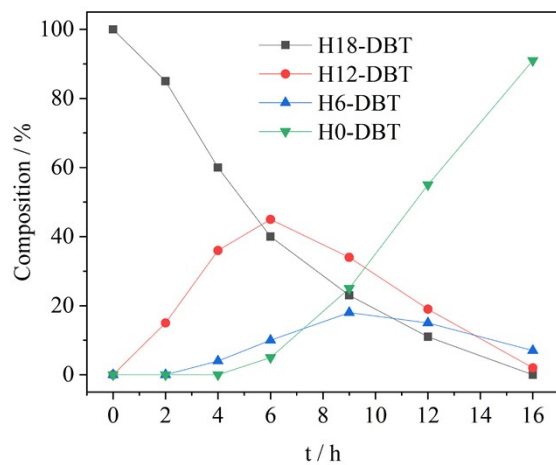

Fig. S3 Hx-DBT species from GC-MS results: composition change during dehydrogenation reaction for H18-DBT species to H12-, H6-, and H0-DBT species versus time.

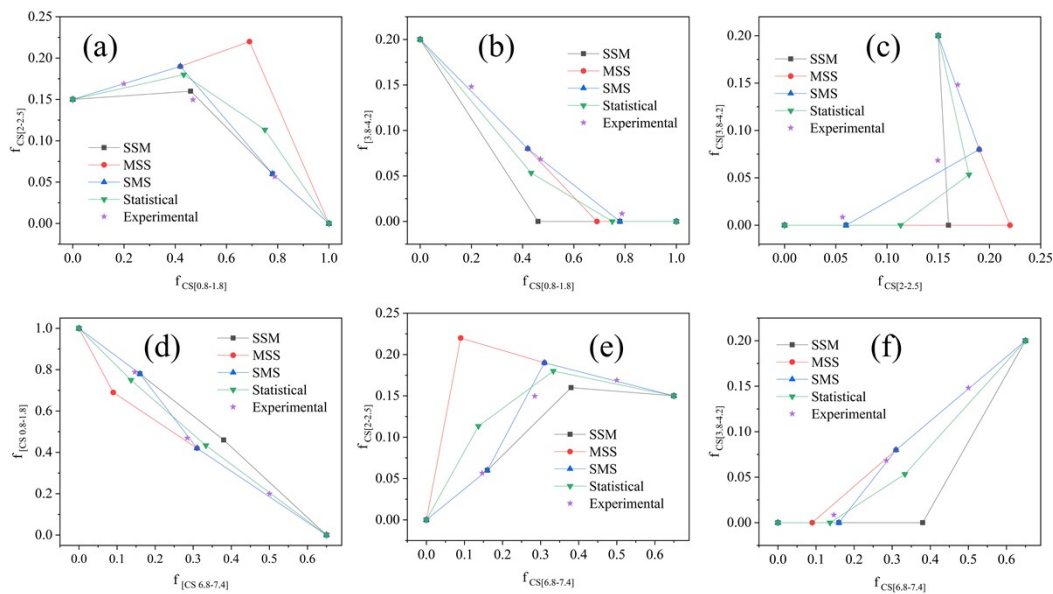

**Fig. S4.** The experimental  $^1\text{H}$  NMR results of dehydrogenation products of  $\text{Pt}/\text{Mo}-\text{Al}_2\text{O}_3$  catalysts (five-pointed stars) and the different dehydrogenation pathways (solid lines)

**Table S1** The average residual between each experimental point and each dehydrogenation pathway over  $\text{Pt}/\text{Mo}-\text{Al}_2\text{O}_3$

| Plots                                                | Average residual |       |       |             |
|------------------------------------------------------|------------------|-------|-------|-------------|
|                                                      | SSM              | MSS   | SMS   | Statistical |
| $f_{\text{CS}[0.8-1.8]} \sim f_{\text{CS}[2-2.5]}$   | 0.016            | 0.089 | 0.021 | 0.043       |
| $f_{\text{CS}[0.8-1.8]} \sim f_{\text{CS}[3.8-4.2]}$ | 0.074            | 0.010 | 0.010 | 0.031       |
| $f_{\text{CS}[2-2.5]} \sim f_{\text{CS}[3.8-4.2]}$   | 0.020            | 0.043 | 0.014 | 0.029       |
| $f_{\text{CS}[6.8-7.4]} \sim f_{\text{CS}[0.8-1.8]}$ | 0.079            | 0.083 | 0.012 | 0.035       |
| $f_{\text{CS}[6.8-7.4]} \sim f_{\text{CS}[2-2.5]}$   | 0.033            | 0.122 | 0.014 | 0.052       |
| $f_{\text{CS}[6.8-7.4]} \sim f_{\text{CS}[3.8-4.2]}$ | 0.122            | 0.012 | 0.009 | 0.032       |
